# Supplementary material for: Oxidative Inactivation of SARS-CoV-2 on Photoactive AgNPs@TiO2 Ceramic Tiles
Source: MDPI journal article supplement (doi:10.3390/ijms22168836), 2021-08-17
Supplement: s1 [file s1]

# Oxidative Deactivation of SARS-CoV-2 on photoactive AgNPs@TiO<sub>2</sub> Ceramic Tiles

R. Djellabi<sup>1\*</sup>, N. Basilico<sup>2</sup>, S. Delbue<sup>2</sup>, S. D'Alessandro<sup>3</sup>, S. Parapini<sup>4</sup>, G. Cerrato<sup>5</sup>, E. Laurenti<sup>5</sup>, E. Falletta<sup>1</sup>, C.L. Bianchi<sup>1\*</sup>

<sup>1</sup>Department of Chemistry, University of Milan, , via Golgi 19, 20133, Milan, Italy

<sup>2</sup>Department of Biomedical, Surgical and Dental Sciences, University of Milan, Via della Commenda 10 20122 Milano, Italy. nicoletta.basilico@unimi.it (N.B.); serena.delbue@unimi.it (S.D.)

<sup>3</sup>Department of Department of Pharmacological and Biomolecular Sciences, University of Milan, Via Bal-zaretti 9, 20133 Milano , Italy . sarah.dalessandro@unimi.it

<sup>4</sup>Department of Biomedical Sciences for Health, University of Milan, Via Luigi Mangiagalli, 31, 20133 Milan, Italy

<sup>5</sup>Department of Chemistry, University of Turin, via P. Giuria 7 – 10125, Turin, Italy

**\*Corresponding authors:** claudia.bianchi@unimi.it; ridha.djellabi@unimi.it

**Supplementary data**

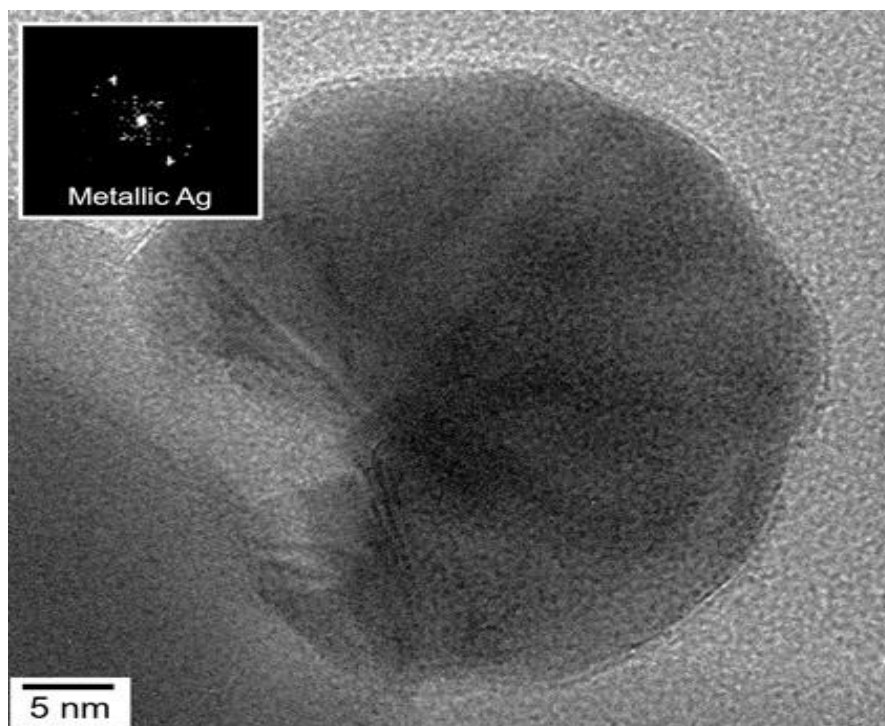

**Figure S1.** FFT analysis to check the form of Ag species in Ag@TiO<sub>2</sub> tile.

**Table S1.** Results of antiviral experiments on the surface of glass and Ag@TiO<sub>2</sub> tile in dark and light irradiation conditions.

| Surface                  | Light | Log<br>PFU/cm <sup>2</sup><br>Time = 0<br>h | Log<br>PFU/cm <sup>2</sup><br>Time = 4<br>h | Log<br>PFU/cm <sup>2</sup><br>Time = 7<br>h | Log10<br>reduction | Viral<br>inhibition<br>% |
|--------------------------|-------|---------------------------------------------|---------------------------------------------|---------------------------------------------|--------------------|--------------------------|
| Glass                    | Dark  | 5.146                                       | 4.339                                       |                                             | 0.807              | 84.40                    |
|                          | LED   | 5.146                                       | 4.244                                       |                                             | 0.902              | 87.47                    |
|                          | UV    | 5.146                                       | 4.205                                       |                                             | 0.941              | 88.55                    |
| Ag-TiO <sub>2</sub> Tile | Dark  | 5.146                                       | 4.104                                       |                                             | 1.042              | 90.92                    |
|                          | LED   | 5.146                                       | 3.903                                       |                                             | 1.243              | 94.29                    |
|                          | UV    | 5.146                                       | 3.371                                       |                                             | 1.775              | 98.32                    |
| Glass                    | Dark  | 5.146                                       |                                             | 3.973                                       | 1.173              | 93.29                    |
|                          | LED   | 5.146                                       |                                             | 3.823                                       | 1.323              | 95.25                    |
|                          | UV    | 5.146                                       |                                             | 3.787                                       | 1.359              | 95.63                    |
| Ag-TiO <sub>2</sub> Tile | Dark  | 5.146                                       |                                             | 3.172                                       | 1.974              | 98.94                    |
|                          | LED   | 5.146                                       |                                             | 2.885                                       | 2.210              | 99.38                    |
|                          | UV    | 5.146                                       |                                             | 2.526                                       | 2.620              | 99.76                    |

**Table S2: Vero cells viability measured by MTT assay**

|                             | Adsorbance<br>OD 650/550 |
|-----------------------------|--------------------------|
| Control                     | 1.151 ± 0.151            |
| Glass                       | 1.293 ± 0.075            |
| Ag@TiO <sub>2</sub> surface | 1.209 ± 0.074            |

Data are the mean and standard deviation from three replicates.
